# Supplementary material
Source: PubMed Central journal article supplement (PMC3346094)
Supplement: supp_M112.350496_jbc.M112.350496-1.pdf [file supp_M112.350496_jbc.M112.350496-1.pdf]

## **SUPPLEMENTAL INFORMATION FOR**

### **FUNCTIONAL INTERACTIONS BETWEEN ERYTHROID KRUPPEL-LIKE FACTOR (EKLF/KLF1) AND PROTEIN PHOSPHATASE PPM1B/PP2C $\beta$**

**Yvette Y. Yien and James J. Bieker**

**FIGURE S1. Induction of EKLF and M2-agarose pulldown of EKLF-interacting proteins.** MEL stable cell lines expressing Zn-inducible FL-EKLF were treated with 100  $\mu$ M Zn for 18 hours to express FL-EKLF. Cell lysates from untreated (-Zn) or treated (+Zn) samples were immunoprecipitated with anti-FLAG M2 agarose. Bound proteins were eluted with FLAG peptide and concentrated using a centricon unit with a 10kDa cutoff. Top: After SDS-PAGE, the gel was fixed with 10% methanol and stained with colloidal blue. Six bands, labelled 1 to 6 as shown, were sliced out of the gel and subjected to mass spectrometric analysis. Molecular weight markers are on the left, and major proteins in each band on the right (see Table S1). Bottom: 5% of cell lysate were subjected to SDS-PAGE electrophoresis and immunolotting with M2-HRP (Sigma) to verify that FL-EKLF was induced.

**FIGURE S2. EKLF likely interacts with multiple isoforms of Ppm1b.** Amino acid alignment of the four Ppm1b isoforms are shown. Of the 10 Ppm1b peptides identified from the gel in Fig. S1 (and tabulated in Table S2), 9 peptide sequences are present in all 4 isoforms; one is unique to the largest isoform (isoform 1).

**TABLE S1. Proteins identified by mass spectrometry in FL-EKLF pulldown experiment shown in Fig. S1.** Accession numbers are given for protein identity in the International Protein Index, <http://www.ebi.ac.uk/IPI>.

**TABLE S2. Peptides corresponding to non-keratin proteins that were identified by mass spectrometry from the gel in Fig. S1.**

**TABLE S3. Nucleotide sequences for siPpm1b that were used for nucleofection in Fig. 2.**

**FIGURE S1**

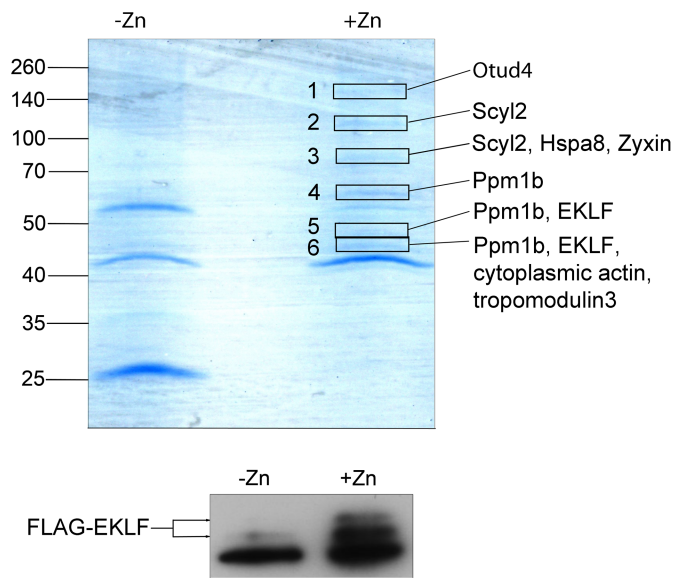

## FIGURE S2

Alignment of mouse Pp1b isoforms

```

isoform_2      MGAFLDKPKTEKHNAHGAGNGLRYGLSSMQGWRVEMEDAHTAVVGIPHGLDMSFFAVYD 60
isoform_1      MGAFLDKPKTEKHNAHGAGNGLRYGLSSMQGWRVEMEDAHTAVVGIPHGLDMSFFAVYD 60
isoform_3      MGAFLDKPKTEKHNAHGAGNGLRYGLSSMQGWRVEMEDAHTAVVGIPHGLDMSFFAVYD 60
Isoform_4      MGAFLDKPKTEKHNAHGAGNGLRYGLSSMQGWRVEMEDAHTAVVGIPHGLDMSFFAVYD 60
*****

isoform_2      GHAGSRVANYCSTHLEHITTTNEDFRAADKSGSALEPSVESVKTGIRTFCLKIDEYMPNF 120
isoform_1      GHAGSRVANYCSTHLEHITTTNEDFRAADKSGSALEPSVESVKTGIRTFCLKIDEYMPNF 120
isoform_3      GHAGSRVANYCSTHLEHITTTNEDFRAADKSGSALEPSVESVKTGIRTFCLKIDEYMPNF 120
Isoform_4      GHAGSRVANYCSTHLEHITTTNEDFRAADKSGSALEPSVESVKTGIRTFCLKIDEYMPNF 120
*****

isoform_2      SDLRNGMDRSGSTAVGVVMSPTTHMYFINCDDSRVAVLCRNGQVCFSTQDHPKPCNPVEKERI 180
isoform_1      SDLRNGMDRSGSTAVGVVMSPTTHMYFINCDDSRVAVLCRNGQVCFSTQDHPKPCNPVEKERI 180
isoform_3      SDLRNGMDRSGSTAVGVVMSPTTHMYFINCDDSRVAVLCRNGQVCFSTQDHPKPCNPVEKERI 180
Isoform_4      SDLRNGMDRSGSTAVGVVMSPTTHMYFINCDDSRVAVLCRNGQVCFSTQDHPKPCNPVEKERI 180
*****

isoform_2      QNAGGSVMIQRWNGSLAVSRALGDYDYKCVDGKSPTEQLVSPPEVYEIVRREEDEFVWL 240
isoform_1      QNAGGSVMIQRWNGSLAVSRALGDYDYKCVDGKSPTEQLVSPPEVYEIVRREEDEFVWL 240
isoform_3      QNAGGSVMIQRWNGSLAVSRALGDYDYKCVDGKSPTEQLVSPPEVYEIVRREEDEFVWL 240
Isoform_4      QNAGGSVMIQRWNGSLAVSRALGDYDYKCVDGKSPTEQLVSPPEVYEIVRREEDEFVWL 240
*****

isoform_2      ACDGIWVMSNEELCEPVKSRLEVSDDLENVGNWVDTCLHKGRDNMSVVLVCFSNAPK 300
isoform_1      ACDGIWVMSNEELCEPVKSRLEVSDDLENVGNWVDTCLHKGRDNMSVVLVCFSNAPK 300
isoform_3      ACDGIWVMSNEELCEPVKSRLEVSDDLENVGNWVDTCLHKGRDNMSVVLVCFSNAPK 300
Isoform_4      ACDGIWVMSNEELCEPVKSRLEVSDDLENVGNWVDTCLHKGRDNMSVVLVCFSNAPK 300
*****

isoform_2      VSEEAVKRDSELDKHLESRVEEIMQKSGEEMPDLAHVMHILSAENIPNLPVGGGLAGKR 360
isoform_1      VSEEAVKRDSELDKHLESRVEEIMQKSGEEMPDLAHVMHILSAENIPNLPVGGGLAGKR 360
isoform_3      VSEEAVKRDSELDKHLESRVEEIMQKSGEEMPDLAHVMHILSAENIPNLPVGGGLAGKR 360
Isoform_4      VSEEAVKRDSELDKHLESRVEEIMQKSGEEMPDLAHVMHILSAENIPNLPVGGGLAGKR 360
*****

isoform_2      HVTEAVYSRLNPHKNDGGAGDLEDS---LVAL--- 390
isoform_1      HVTEAVYSRLNPHKNDGASDEAEEGSQGLVEALRQMRVNHRYQLLEEMLTSYI 420
isoform_3      HVTEAVYSRLNPHKNDGMADLSTSI---ICKPS 390
isoform_4      HVTEAVYSRLNPHKNDGFYQPSIAYSDN---VFLL 393
*****

isoform_2      ----- 477
isoform_1      AKVVEEESPADAAAAAASSNSDGGNPVAMQERDTEGGPAGLDSRNEDAGTKRISAENI 477
isoform_3      -----
Isoform_4      -----

```

# SUPPLEMENTARY TABLE 1

Sheet1

| <b>B01</b>                                      |                         |                         |
|-------------------------------------------------|-------------------------|-------------------------|
| <b>Identified Proteins (4)</b>                  | <b>Accession Number</b> | <b>Molecular Weight</b> |
| Keratin, type II cytoskeletal 1                 | IPI00625729             | 66 kDa                  |
| Keratin complex 1, acidic, gene 10              | IPI00755181 (+2)        | 57 kDa                  |
| Otud4 protein (Otud 4)                          | IPI00137459             | 123 kDa                 |
| Keratin type I cytoskeletal 19                  | IPI00112947 (+3)        | 45 kDa                  |
| <b>B02</b>                                      |                         |                         |
| <b>Identified Proteins (5)</b>                  | <b>Accession Number</b> | <b>Molecular Weight</b> |
| Isoform 1 of SCY1-like protein 2 (Scyl 2)       | IPI00229287             | 103 kDa                 |
| Keratin complex 1, acidic, gene 10              | IPI00755181 (+2)        | 57 kDa                  |
| Keratin, type II cytoskeletal 1                 | IPI00625729             | 66 kDa                  |
| Keratin, type II cytoskeletal 79                | IPI00124499             | 58 kDa                  |
| Krt19 Keratin, type I cytoskeletal 19           | IPI00112947 (+3)        | 45 kDa                  |
| <b>B03</b>                                      |                         |                         |
| <b>Identified Proteins (6)</b>                  | <b>Accession Number</b> | <b>Molecular Weight</b> |
| Zyxin                                           | IPI00387422 (+1)        | 61 kDa                  |
| Keratin, type II cytoskeletal 1                 | IPI00625729             | 66 kDa                  |
| Heat shock cognate 71 kDa protein (Hspa 8)      | IPI00323357 (+2)        | 71 kDa                  |
| Isoform 1 of SCY1-like protein 2 (Scyl 2)       | IPI00229287             | 103 kDa                 |
| Keratin 15, isoform CRA_a                       | IPI00225378 (+1)        | 49 kDa                  |
| Keratin, type II cytoskeletal 2 epidermal       | IPI00622240 (+1)        | 71 kDa                  |
| <b>B04</b>                                      |                         |                         |
| <b>Identified Proteins (4)</b>                  | <b>Accession Number</b> | <b>Molecular Weight</b> |
| Ppm1b, Protein phosphatase 1B                   | IPI00118736             | 52 kDa                  |
| Keratin, type II cytoskeletal 5                 | IPI00139301             | 62 kDa                  |
| Keratin, type II cytoskeletal 1                 | IPI00625729             | 66 kDa                  |
| Keratin complex 1, acidic, gene 10              | IPI00755181 (+2)        | 57 kDa                  |
| <b>B05</b>                                      |                         |                         |
| <b>Identified Proteins (4)</b>                  | <b>Accession Number</b> | <b>Molecular Weight</b> |
| Keratin complex 1, acidic, gene 10              | IPI00755181 (+2)        | 57 kDa                  |
| Ppm1b, Protein phosphatase 1B                   | IPI00118736 (+5)        | 52 kDa                  |
| Keratin, type II cytoskeletal 1                 | IPI00625729             | 66 kDa                  |
| Keratin, type I cytoskeletal 42                 | IPI00468696             | 50 kDa                  |
| Kruppel-like factor 1 (EKLF)                    | IPI00230364             | 40 kDa                  |
| <b>B06</b>                                      |                         |                         |
| <b>Identified Proteins (6)</b>                  | <b>Accession Number</b> | <b>Molecular Weight</b> |
| Ppm1b, Isoform Beta-1 of Protein phosphatase 1B | IPI00876176             | 43 kDa                  |
| Actin, cytoplasmic 1                            | IPI00110850             | 42 kDa                  |
| Keratin, type II cytoskeletal 1                 | IPI00625729             | 66 kDa                  |
| Tropomodulin-3                                  | IPI00119478             | 40 kDa                  |
| Keratin, type II cytoskeletal 5                 | IPI00139301             | 62 kDa                  |
| Keratin 15, isoform CRA_a                       | IPI00225378             | 49 kDa                  |
| Klf1 Kruppel-like factor 1 (EKLF)               | IPI00230364             | 40 kDa                  |

# SUPPLEMENTARY TABLE 2

Sheet1

| Protein name                                                                       | Protein accession numbers                       | No. unique peptides | Peptide sequence    | Best Peptide identification probability | Peptide start index | Peptide stop index |
|------------------------------------------------------------------------------------|-------------------------------------------------|---------------------|---------------------|-----------------------------------------|---------------------|--------------------|
| IPI:IPI00118736.3 Tax_Id=10090 Gene_Symbol=Ppm1b Putative uncharacterized protein  | IPI00118736                                     | 10                  | ALGDYDYK            | 95.00%                                  | 201                 | 208                |
| IPI:IPI00118736.3 Tax_Id=10090 Gene_Symbol=Ppm1b Putative uncharacterized protein  | IPI00118736                                     | 10                  | DSELDKHLERS         | 95.00%                                  | 309                 | 319                |
| IPI:IPI00118736.3 Tax_Id=10090 Gene_Symbol=Ppm1b Putative uncharacterized protein  | IPI00118736                                     | 10                  | GPTEQLVSPPEVVEIVR   | 95.00%                                  | 214                 | 231                |
| IPI:IPI00118736.3 Tax_Id=10090 Gene_Symbol=Ppm1b Putative uncharacterized protein  | IPI00118736                                     | 10                  | HVIEAVYSR           | 95.00%                                  | 361                 | 369                |
| IPI:IPI00118736.3 Tax_Id=10090 Gene_Symbol=Ppm1b Putative uncharacterized protein  | IPI00118736                                     | 10                  | ILSAENIPNLPPGGGLAGK | 95.00%                                  | 341                 | 359                |
| IPI:IPI00118736.3 Tax_Id=10090 Gene_Symbol=Ppm1b Putative uncharacterized protein  | IPI00118736                                     | 10                  | IQNAGGSVMIQR        | 95.00%                                  | 180                 | 191                |
| IPI:IPI00118736.3 Tax_Id=10090 Gene_Symbol=Ppm1b Putative uncharacterized protein  | IPI00118736                                     | 10                  | QLLEEMLTSYR         | 95.00%                                  | 409                 | 419                |
| IPI:IPI00118736.3 Tax_Id=10090 Gene_Symbol=Ppm1b Putative uncharacterized protein  | IPI00118736                                     | 10                  | SGEEGMPDLAHVMR      | 95.00%                                  | 327                 | 340                |
| IPI:IPI00118736.3 Tax_Id=10090 Gene_Symbol=Ppm1b Putative uncharacterized protein  | IPI00118736                                     | 10                  | VNGSLAVSR           | 95.00%                                  | 192                 | 200                |
| IPI:IPI00118736.3 Tax_Id=10090 Gene_Symbol=Ppm1b Putative uncharacterized protein  | IPI00118736                                     | 10                  | YGLSSMQGWR          | 95.00%                                  | 24                  | 33                 |
| IPI:IPI00387422.3 Tax_Id=10090 Gene_Symbol=Zyx zyxin                               | IPI00387422,IPI00408218                         | 6                   | FAPVAPK             | 95.00%                                  | 257                 | 263                |
| IPI:IPI00387422.3 Tax_Id=10090 Gene_Symbol=Zyx zyxin                               | IPI00387422,IPI00408218                         | 6                   | FAPVVAPKPK          | 95.00%                                  | 26                  | 35                 |
| IPI:IPI00387422.3 Tax_Id=10090 Gene_Symbol=Zyx zyxin                               | IPI00387422,IPI00408218                         | 6                   | FSPGAPSGPGQPQNK     | 95.00%                                  | 271                 | 286                |
| IPI:IPI00387422.3 Tax_Id=10090 Gene_Symbol=Zyx zyxin                               | IPI00387422,IPI00408218                         | 6                   | GPLSQAPTPAPK        | 95.00%                                  | 245                 | 256                |
| IPI:IPI00387422.3 Tax_Id=10090 Gene_Symbol=Zyx zyxin                               | IPI00387422,IPI00408218                         | 6                   | SPGGPGLTLK          | 95.00%                                  | 336                 | 346                |
| IPI:IPI00387422.3 Tax_Id=10090 Gene_Symbol=Zyx zyxin                               | IPI00387422,IPI00408218                         | 6                   | VNPFPRGDSEPPVAAGAQR | 95.00%                                  | 36                  | 54                 |
| IPI:IPI00229287.3 Tax_Id=10090 Gene_Symbol=Scyl2 Isoform 1 of SCY1-like protein 2  | IPI00229287                                     | 5                   | LGSSSLTSIPEEVR      | 95.00%                                  | 288                 | 301                |
| IPI:IPI00229287.3 Tax_Id=10090 Gene_Symbol=Scyl2 Isoform 1 of SCY1-like protein 2  | IPI00229287                                     | 5                   | LILPELGPVFK         | 95.00%                                  | 408                 | 418                |
| IPI:IPI00229287.3 Tax_Id=10090 Gene_Symbol=Scyl2 Isoform 1 of SCY1-like protein 2  | IPI00229287                                     | 5                   | QEVAVFVFDKK         | 95.00%                                  | 59                  | 69                 |
| IPI:IPI00229287.3 Tax_Id=10090 Gene_Symbol=Scyl2 Isoform 1 of SCY1-like protein 2  | IPI00229287                                     | 5                   | VTADVTSAVMGNPVTR    | 95.00%                                  | 15                  | 30                 |
| IPI:IPI00229287.3 Tax_Id=10090 Gene_Symbol=Scyl2 Isoform 1 of SCY1-like protein 2  | IPI00229287                                     | 5                   | YGLLQVSEGLSFLHSSVK  | 95.00%                                  | 156                 | 173                |
| IPI:IPI00110850.1 Tax_Id=10090 Gene_Symbol=Actb Actin, cytoplasmic 1               | IPI00110850                                     | 4                   | AGFAGDDAPR          | 95.00%                                  | 19                  | 28                 |
| IPI:IPI00110850.1 Tax_Id=10090 Gene_Symbol=Actb Actin, cytoplasmic 1               | IPI00110850                                     | 4                   | EITALAPSTMK         | 95.00%                                  | 316                 | 326                |
| IPI:IPI00110850.1 Tax_Id=10090 Gene_Symbol=Actb Actin, cytoplasmic 1               | IPI00110850                                     | 4                   | GYSFTTAEER          | 95.00%                                  | 197                 | 206                |
| IPI:IPI00110850.1 Tax_Id=10090 Gene_Symbol=Actb Actin, cytoplasmic 1               | IPI00110850                                     | 4                   | VAPEEHPVLLTEAPLNPK  | 95.00%                                  | 96                  | 113                |
| IPI:IPI00119478.1 Tax_Id=10090 Gene_Symbol=Tmod3 Tropomodulin-3                    | IPI00119478                                     | 3                   | MLEENTNLIK          | 95.00%                                  | 308                 | 317                |
| IPI:IPI00119478.1 Tax_Id=10090 Gene_Symbol=Tmod3 Tropomodulin-3                    | IPI00119478                                     | 3                   | QLLGTSELEMAK        | 95.00%                                  | 295                 | 307                |
| IPI:IPI00119478.1 Tax_Id=10090 Gene_Symbol=Tmod3 Tropomodulin-3                    | IPI00119478                                     | 3                   | SNDPVAVAFADMLK      | 95.00%                                  | 239                 | 252                |
| IPI:IPI00137459.6 Tax_Id=10090 Gene_Symbol=Otud4 Otud4 protein                     | IPI00137459                                     | 2                   | AVAEQVLHSQSR        | 95.00%                                  | 49                  | 60                 |
| IPI:IPI00137459.6 Tax_Id=10090 Gene_Symbol=Otud4 Otud4 protein                     | IPI00137459                                     | 2                   | KADIDLASGSSAVEGK    | 95.00%                                  | 939                 | 954                |
| IPI:IPI00230364.7 Tax_Id=10090 Gene_Symbol=Klf1 Kruppel-like factor 1              | IPI00230364                                     | 2                   | AGSVGGFFPR          | 95.00%                                  | 187                 | 196                |
| IPI:IPI00230364.7 Tax_Id=10090 Gene_Symbol=Klf1 Kruppel-like factor 1              | IPI00230364                                     | 2                   | SEETQDLGPPNPPTGPLSL | 95.00%                                  | 51                  | 74                 |
| IPI:IPI00323357.3 Tax_Id=10090 Gene_Symbol=Hspa8 Heat shock cognate 71 kDa protein | IPI00323357,IPI00457741,IPI00457741,IPI00457741 | 2                   | DAGTIAGLNVLR        | 95.00%                                  | 160                 | 171                |
| IPI:IPI00323357.3 Tax_Id=10090 Gene_Symbol=Hspa8 Heat shock cognate 71 kDa protein | IPI00323357,IPI00457741,IPI00457741,IPI00457741 | 2                   | TTPSYVAFTDER        | 95.00%                                  | 37                  | 49                 |

SUPPLEMENTARY TABLE 3

|     | Catalog no. | Target sequence       |
|-----|-------------|-----------------------|
| si1 | SI02759197  | TAGCCTAACTACACACATCAA |
| si2 | SI02658677  | CGACATAACATGAGTATTGTA |
| si3 | SI04436362  | ATCACAAACCTTGCAATCCAA |
